# Supplementary material
Source: publisher figshare collection journal article supplement (https://frontiersin.figshare.com/ndownloader/files/21957708)
Supplement: Supplementary file 1 [file 21957708]

## ***Supplementary Material***

### **1 SUPPLEMENTARY FIGURES**

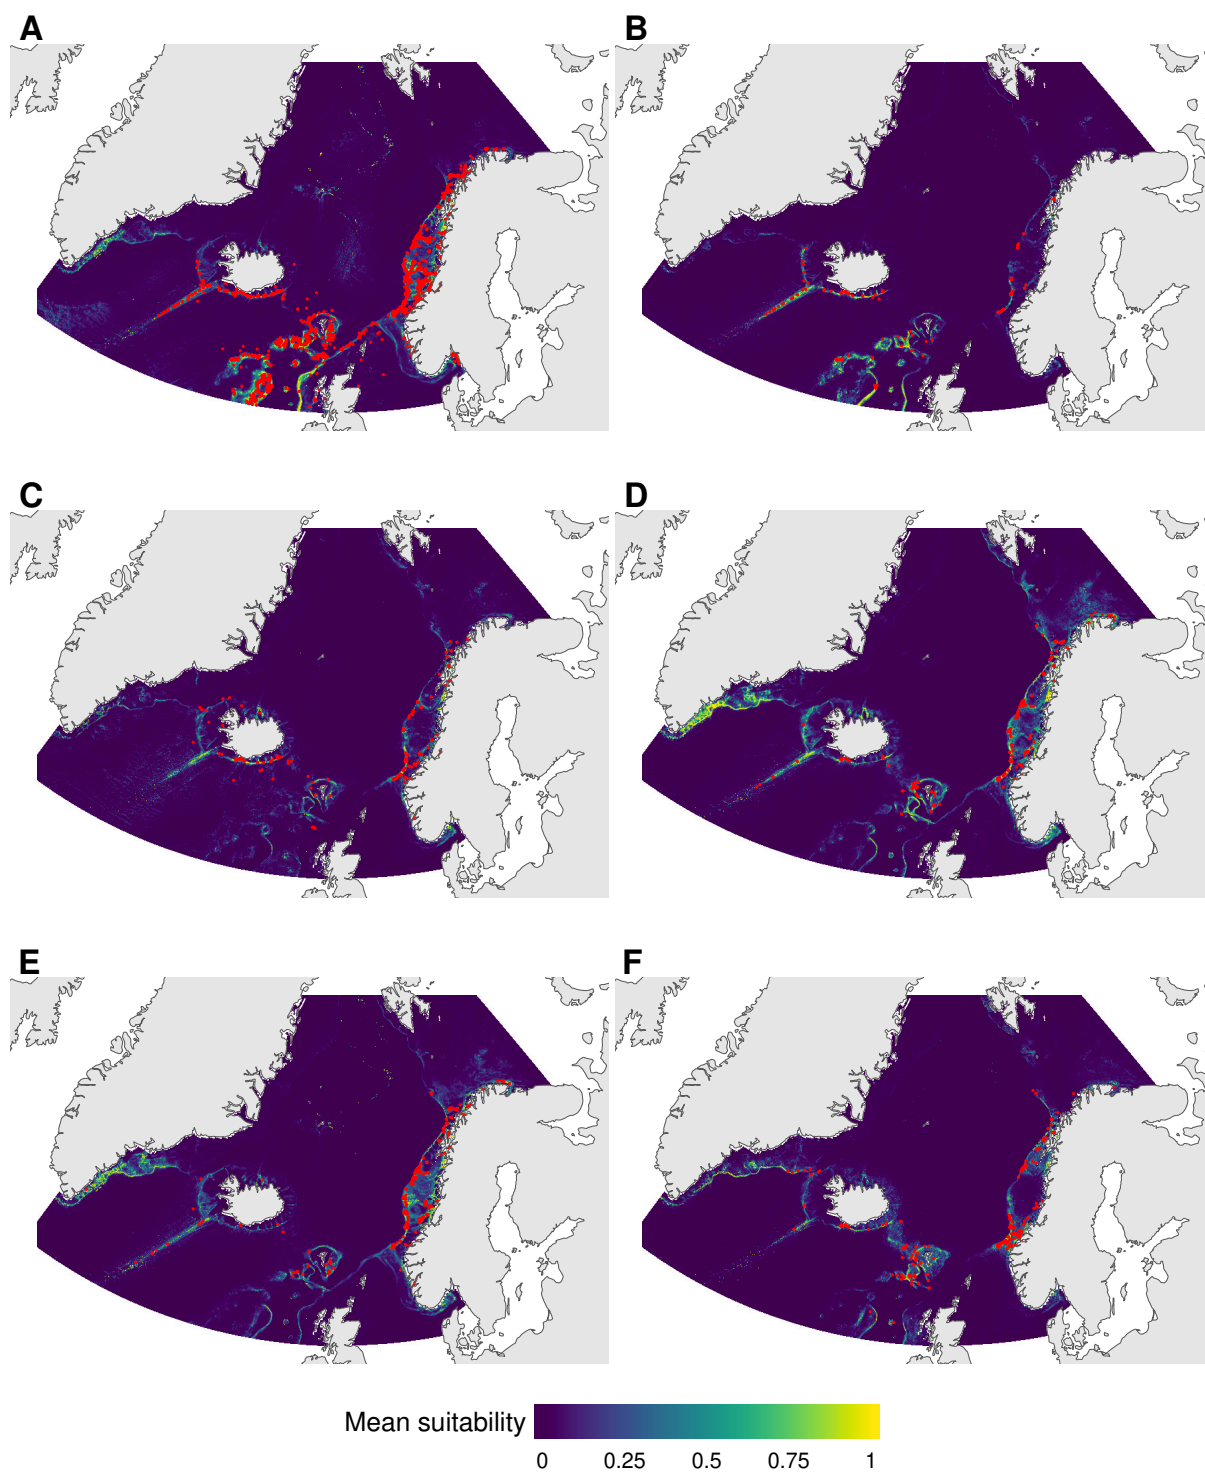

**Figure S1.** Predicted distribution of VME indicator taxa assigned to group 1: (A) *Lophelia pertusa*, (B) *Madrepora oculata*, (C) *Paramuricea* sp., (D) *Primnoa resedagormis*, (E) *Paragorgia arborea*, (F) Stylasteridae. Red dots indicate locations of records.

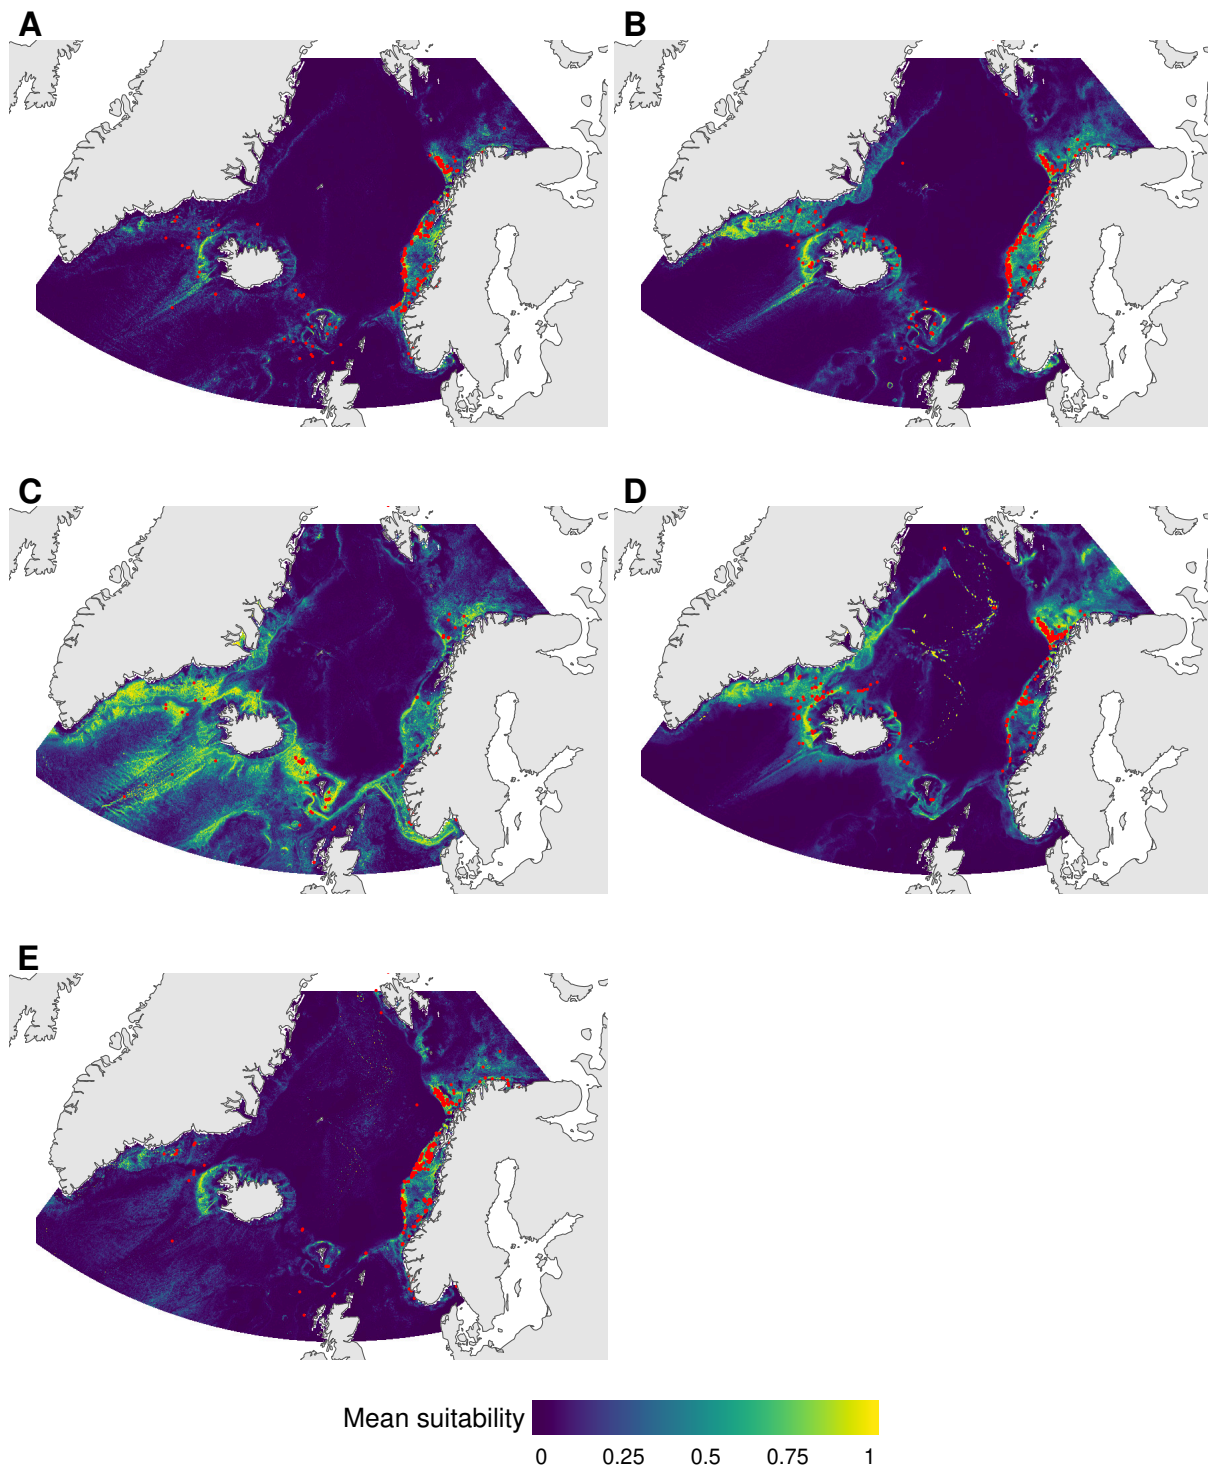

**Figure S2.** Predicted distribution of VME indicator taxa assigned to group 2: (A) *Geodia atlantica*, (B) *G. macandrewi*, (C) *G. phlegraei*, (D) *Stelletta* sp., (E) *Stryphnus* sp. Red dots indicate locations of records.

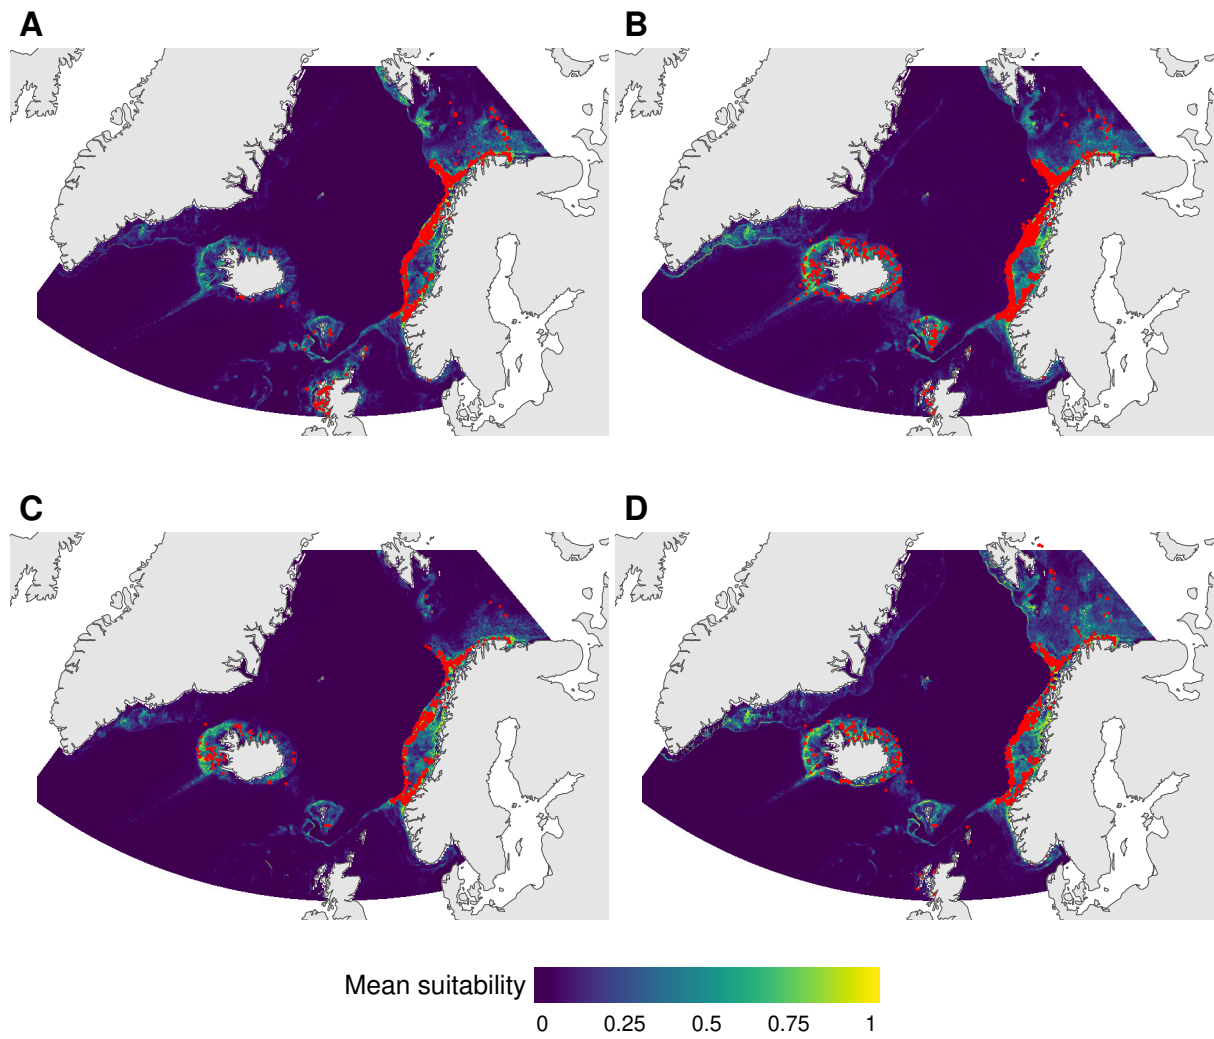

**Figure S3.** Predicted distribution of VME indicator taxa assigned to group 3A: (A) *Axinella* sp., (B) *Phakelia* sp., (C) *Antho* (A.) *dichotoma*, (D) *Mycale* (*Mycale*) *lingua*. Red dots indicate locations of records.



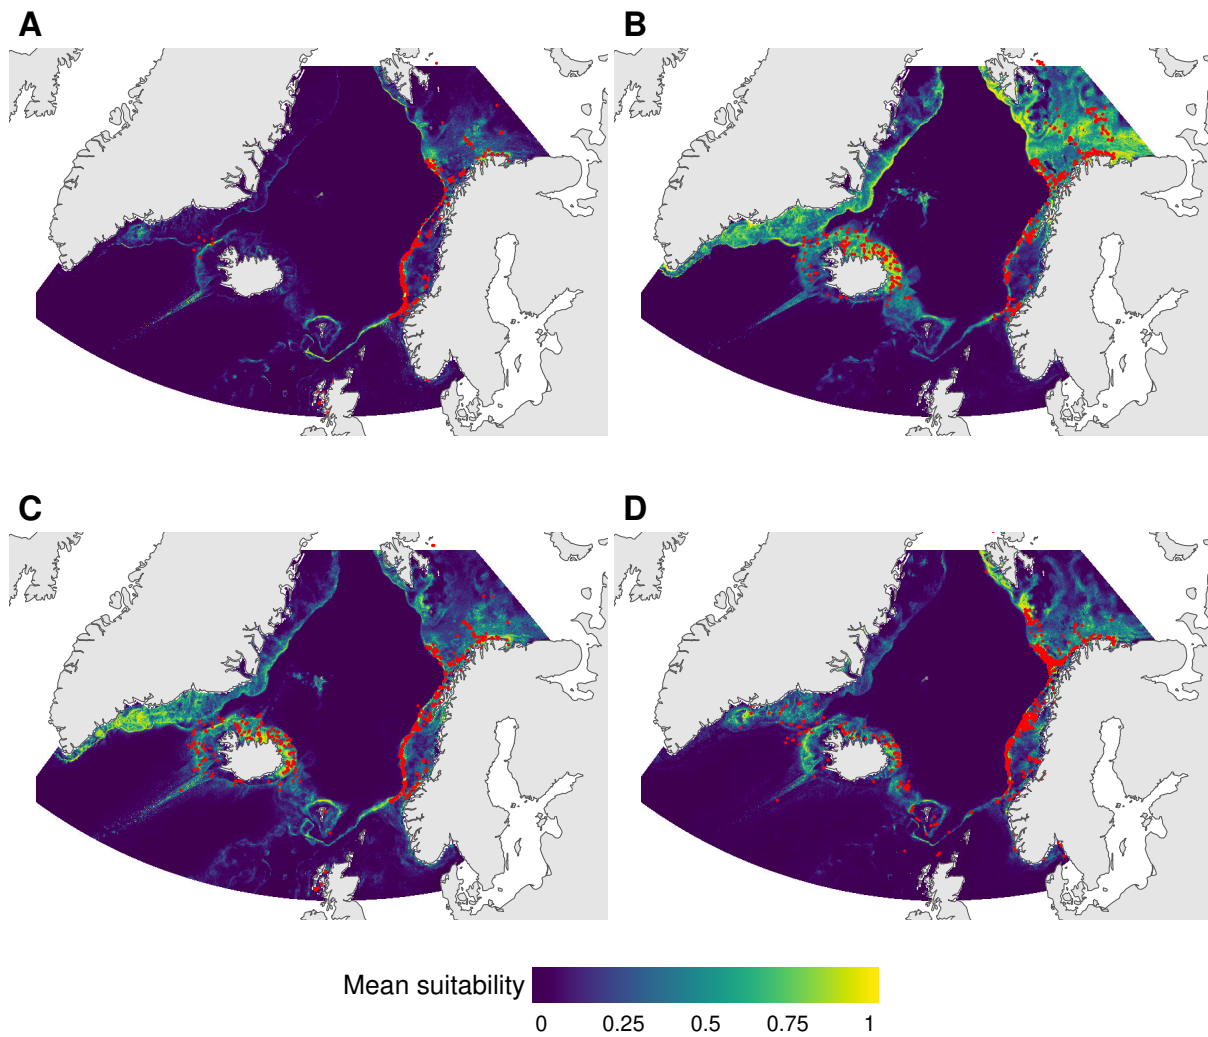

**Figure S4.** Predicted distribution of VME indicator taxa assigned to group 3B: (A) *Thetya* sp., (B) *Polymasta* sp., (C) Tetillidae, (D) *Geodia barretti*. Red dots indicate locations of records.

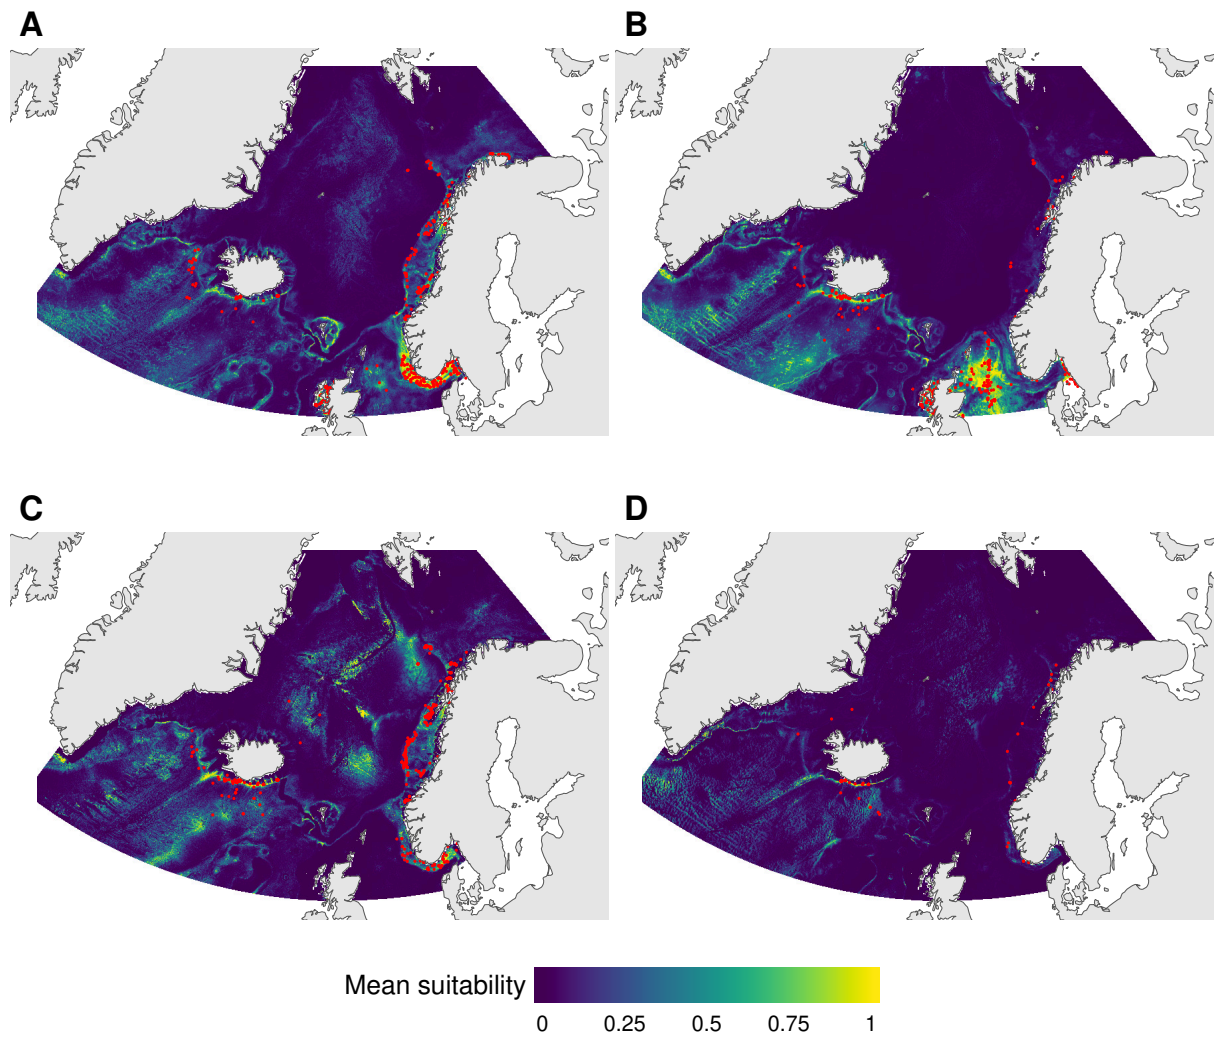

**Figure S5.** Predicted distribution of VME indicator taxa assigned to group 4: (A) *Funiculina* sp., (B) *Pennatula* sp., (C) *Kophobelemnon* sp., (D) *Halipteris* sp. Red dots indicate locations of records.

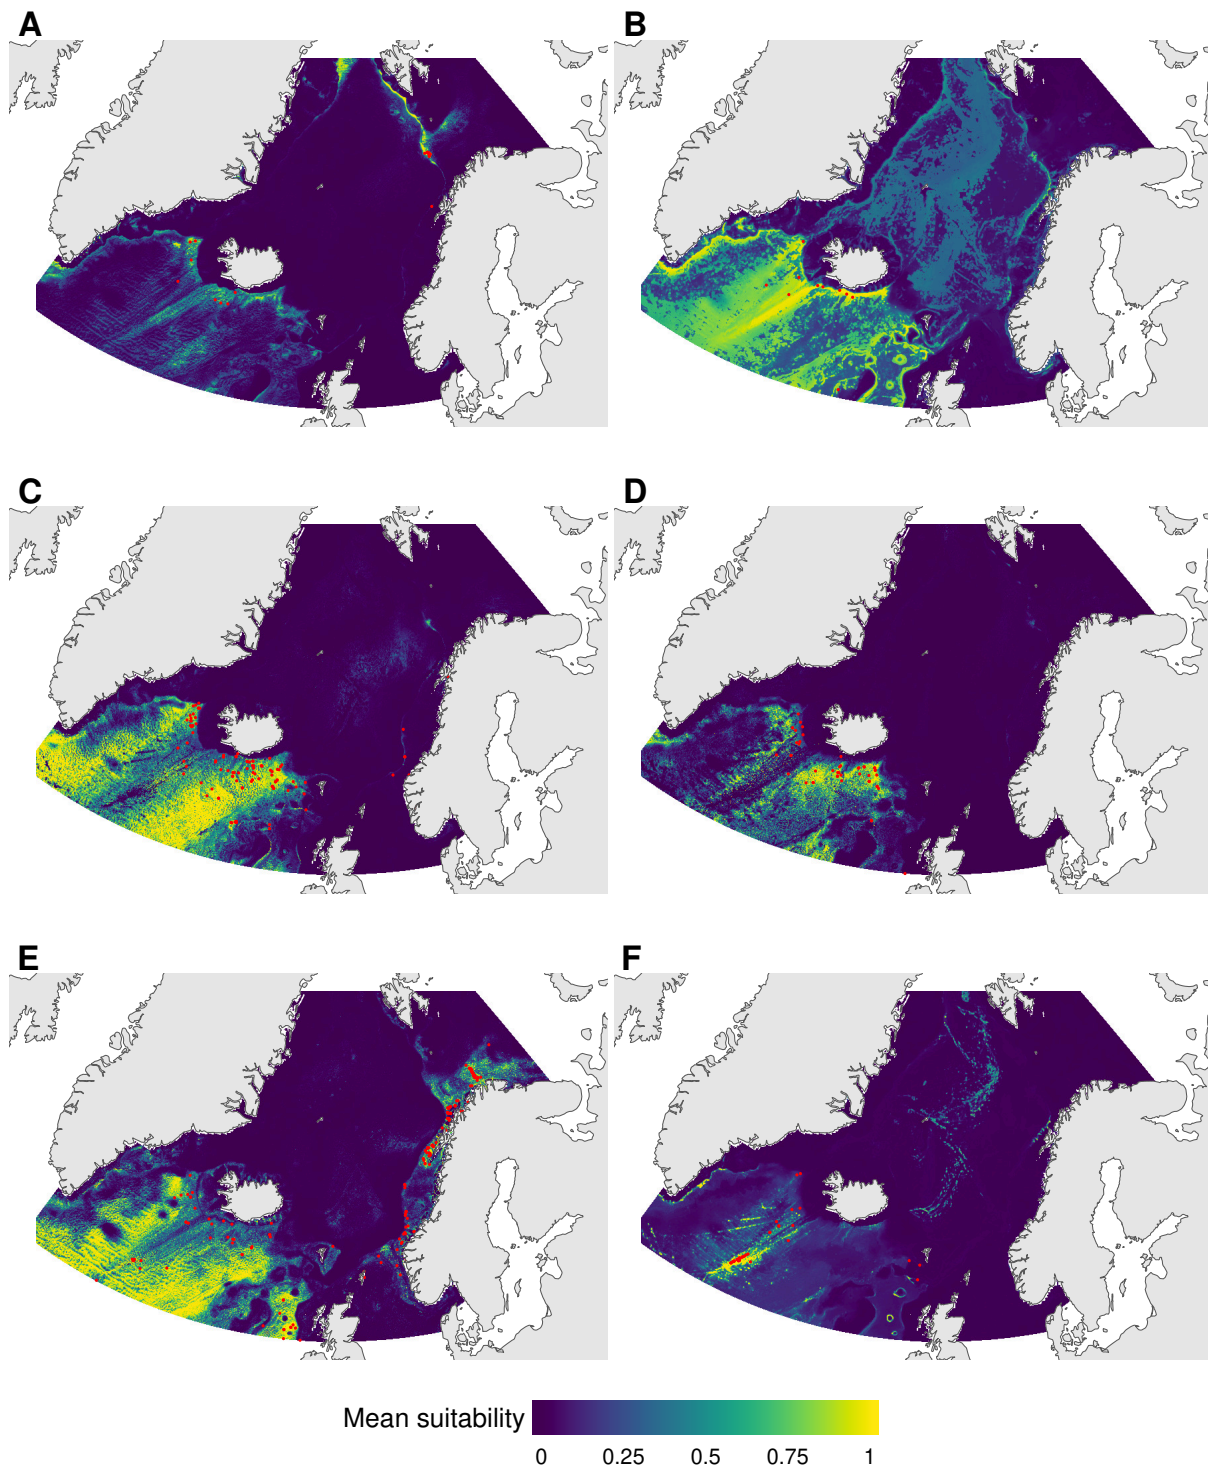

**Figure S6.** Predicted distribution of VME indicator taxa assigned to group 5: (A) *Radicipes* sp., (B) *Anthotella grandiflora*, (C) *Anthomastus* sp., (D) *Anthoptylum* sp., (E) *Flabellum* sp., (F) *Solenosmilia variabilis*. Red dots indicate locations of records.



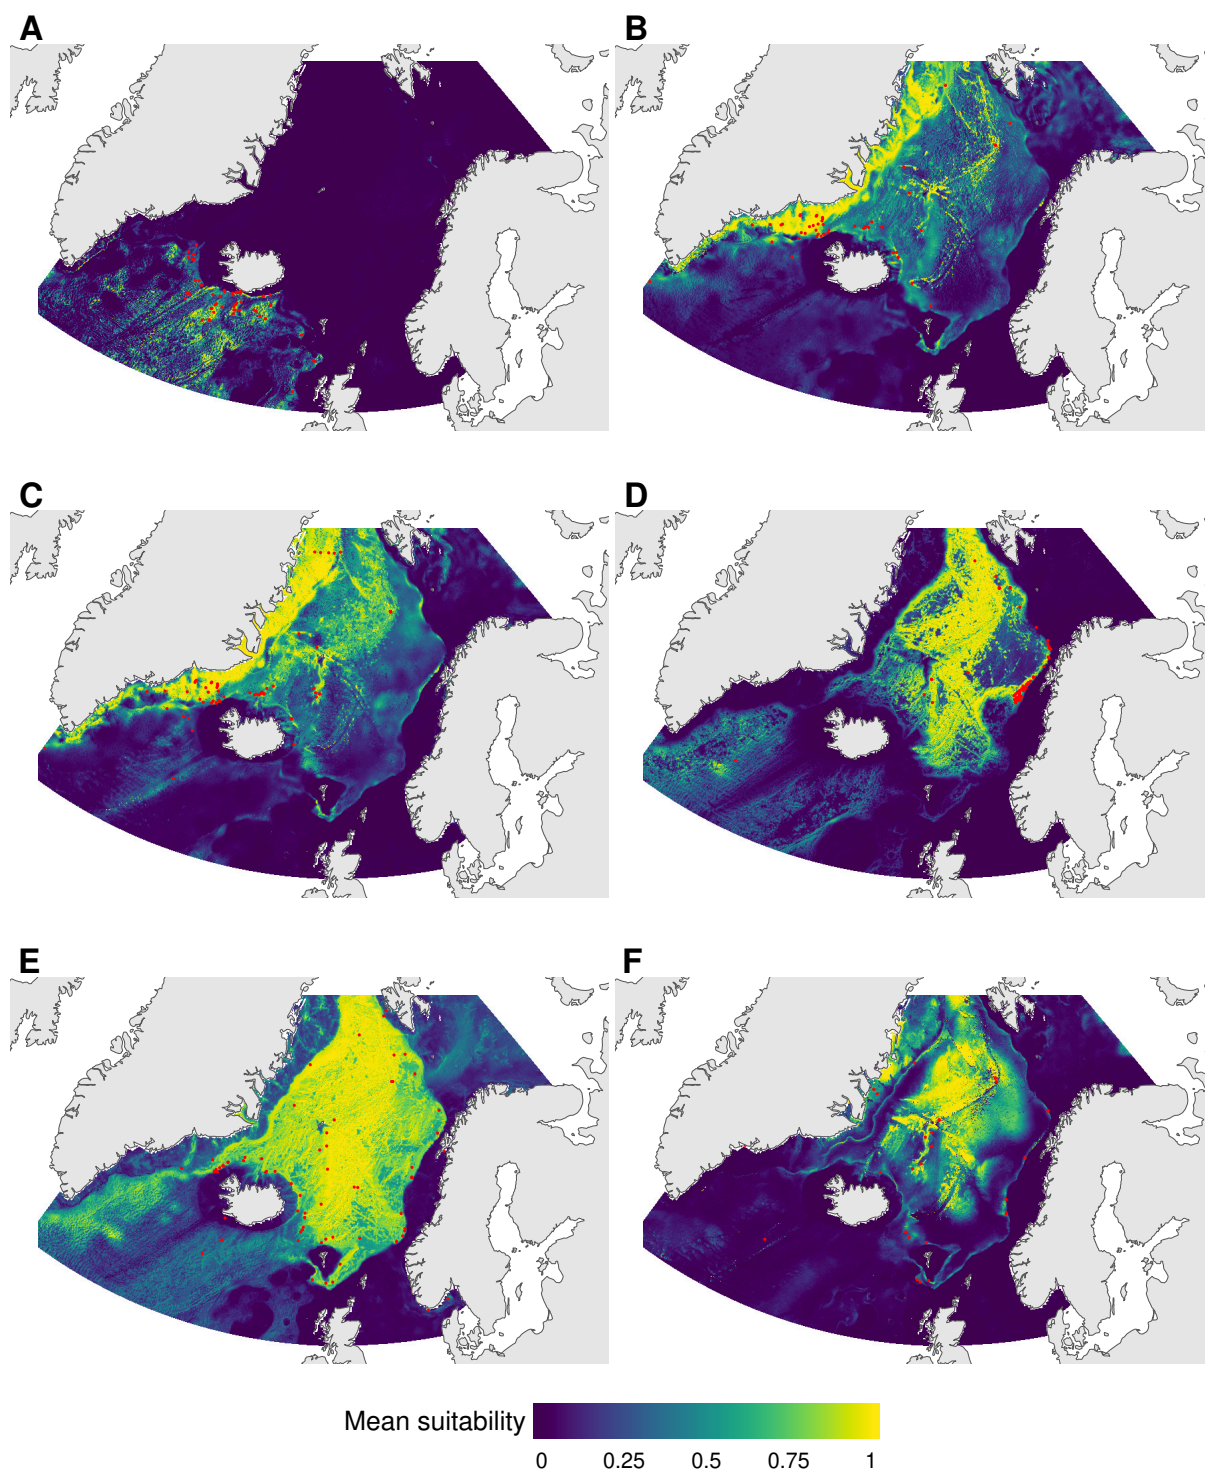

**Figure S7.** Predicted distribution of VME indicator taxa assigned to groups 5, 6A and 6B: (A) *Acanella arbuscula*, (B) *Geodia parva*, (C) *G. hentschelli*, (D) *Caulophacus (Caulophacus) arcticus*, (E) *Cladorrhiza* sp., (F) *Lycopodina* sp. Red dots indicate locations of records.

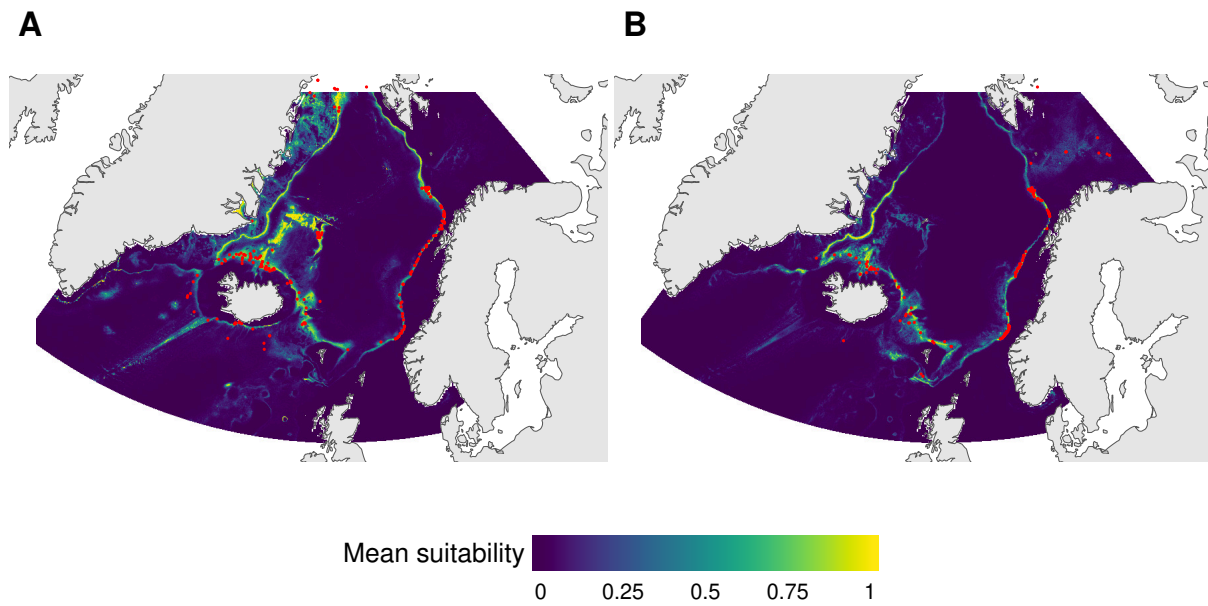

**Figure S8.** Predicted distribution of VME indicator taxa assigned to group 7A: (A) *Umbellula* sp., (B) *Chondrocladia* (*Chondrocladia*) *grandis*. Red dots indicate locations of records.



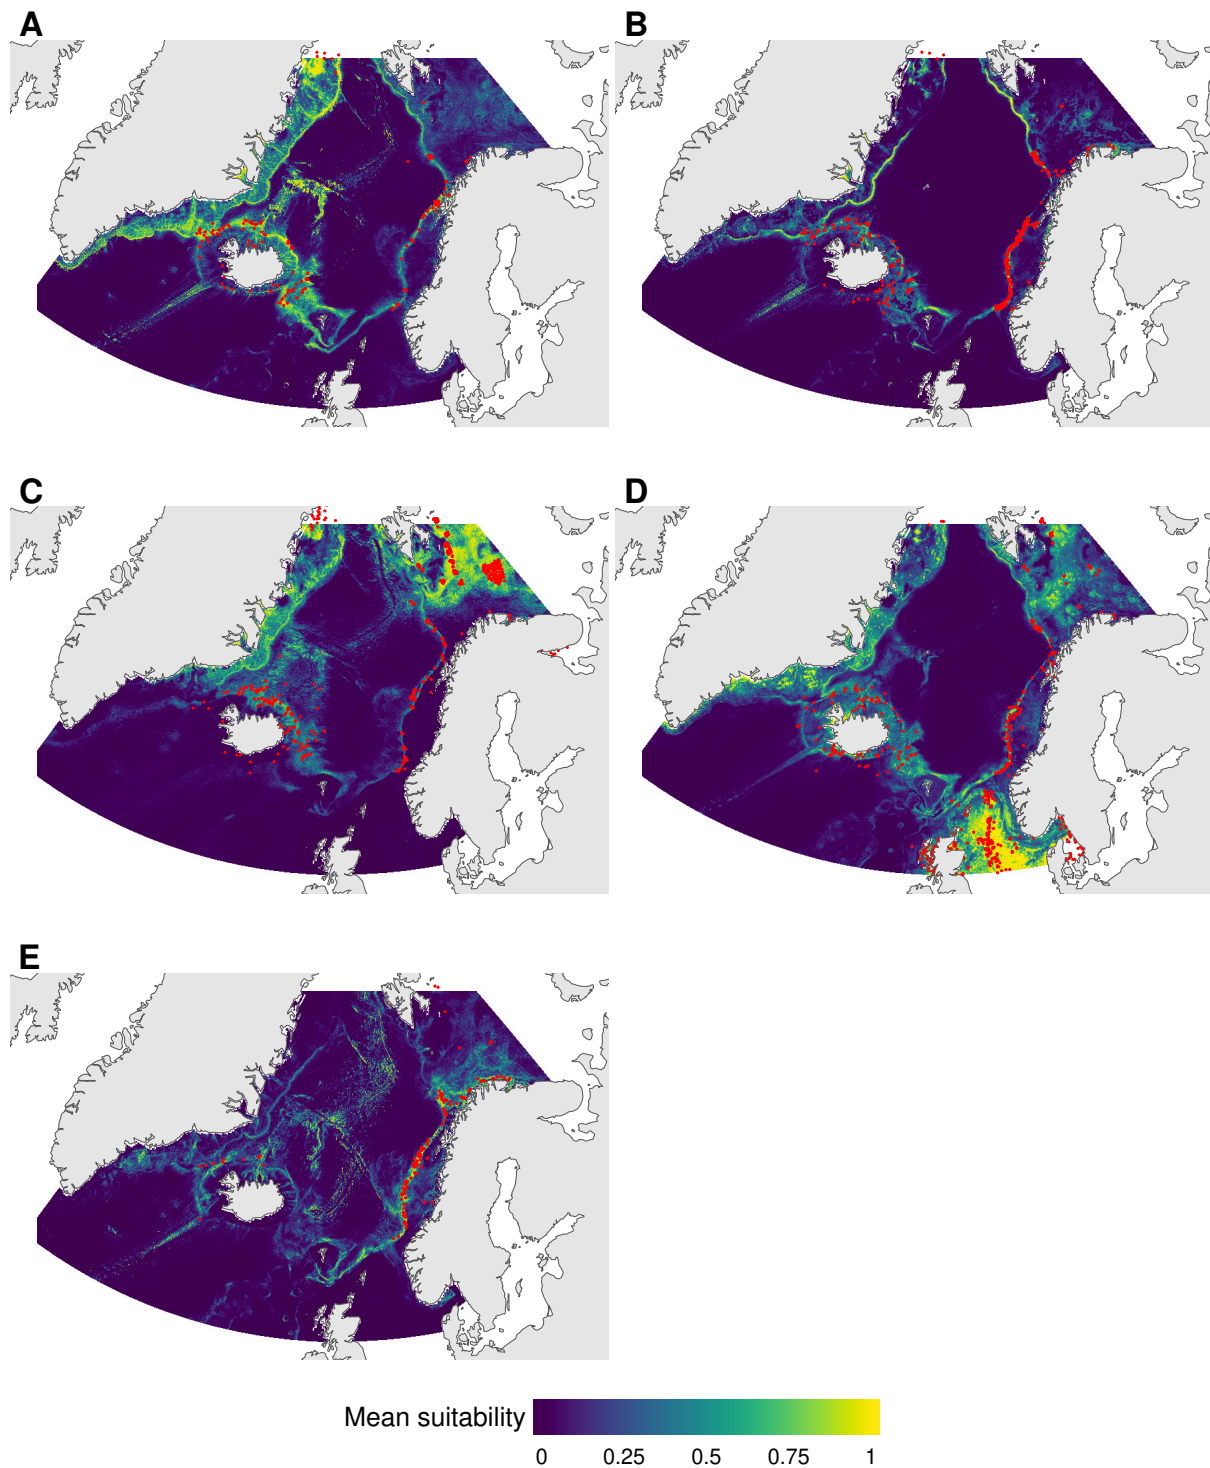

**Figure S9.** Predicted distribution of VME indicator taxa assigned to group 7B: (A) *Drifa glomerata*, (B) *Duva florida*, (C) *Gersemia* sp., (D) *Virgularia* sp., (E) *Asconema* sp. Red dots indicate locations of records.

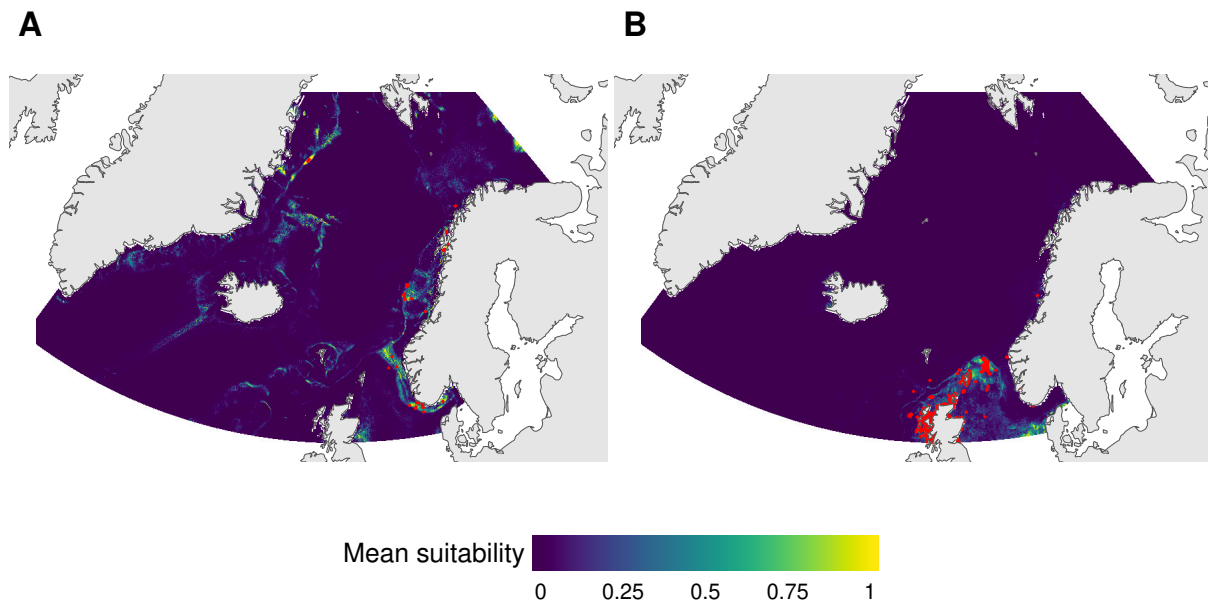

**Figure S10.** Predicted distribution of VME indicator taxa: (A) *Isidella lofotensis*, (B) *Caryophylla (Caryophylla) smithii*. Red dots indicate locations of records.
